# Supplementary material
Source: publisher figshare collection journal article supplement (https://frontiersin.figshare.com/ndownloader/files/21225033)
Supplement: Supplementary file [file 21225033]

Supplementary Table 1. Primer sequences used for RACE-PCR and qPCR of  $Na^+/K^+$ -ATPase (*nka*)  $\alpha$ -subunit isoforms

| Gene                             | Primer Type | Sequence (5'–3')               |
|----------------------------------|-------------|--------------------------------|
| <i>nka<math>\alpha</math>1b</i>  | 5'RACE-PCR  | TCCTAGAACTCTTTCTCCAAGACCACCCAG |
|                                  | 3'RACE-PCR  | CTGGGTGGTCTTGGAGAAAGAGTT       |
|                                  | qPCR        | GCATCTTGTCTATGATTCTTGG         |
|                                  |             | TGACTGTGGCTAGTAATCCTT          |
| <i>nka<math>\alpha</math>1c1</i> | 5'RACE-PCR  | CAGTTGACACGCACTCCTATTAAGTCTG   |
|                                  | 3'RACE-PCR  | TAACCAGATCCACGAAGCCGACACC      |
|                                  | qPCR        | AACACTTGCTCGTAATGAAAGG         |
|                                  |             | AAGACCGCCAAGTTCCAC             |
| <i>nka<math>\alpha</math>1c2</i> | 5'RACE-PCR  | CATAATAGTTGAGCATCGATCCAGAATCC  |
|                                  | 3'RACE-PCR  | TAACCAGATCCACGAAGCCGACACC      |
|                                  | qPCR        | TTGTCCATCCACAAGAACC            |
|                                  |             | CCCAACTCCAAGTAGGCA             |
| <i>nka<math>\alpha</math>2</i>   | 5'RACE-PCR  | CTGAAACTTGTTGGTTGAGTTGAAGGGAA  |
|                                  | 3'RACE-PCR  | TTCCCTTCAACTCAACCAACAAGTTTCAG  |
|                                  | qPCR        | TTCATTCTTCGTCCTCTCACTC         |
|                                  |             | CAAAGTCTCTACAGCCTCCA           |
| <i>nka<math>\alpha</math>3</i>   | 5'RACE-PCR  | CTCTGCTACTTTCTTGTTCTTGTCCCTCAT |
|                                  | 3'RACE-PCR  | GAGGGACAAGAACAAGAAAGTAGCAGAGAT |
|                                  | qPCR        | GGACAAGAACAAGAAAGTAGCA         |
|                                  |             | CATCACCAGCAGATAGGGAG           |
